# Supplementary material for: Enhanced up-conversion and temperature-sensing behaviour of Er3+ and Yb3+ co-doped Y2Ti2O7 by incorporation of Li+ ions
Source: Royal Society of Chemistry journal article supplement (doi:10.1039/c4cp02949f), 2014-01-01
Supplement: c4cp02949f1.pdf [file c4cp02949f1.pdf]

Electronic Supplementary Information (ESI) available

## Enhanced up-conversion and temperature-sensing behaviour of Er<sup>3+</sup> and Yb<sup>3+</sup> co-doped Y<sub>2</sub>Ti<sub>2</sub>O<sub>7</sub> by incorporation of Li<sup>+</sup> ions

5 B. P. Singh,<sup>a</sup> A. K. Parchur,<sup>\*b,c</sup> R. S. Ningthoujam,<sup>d</sup> P. V. Ramakrishna,<sup>e</sup> S. Singh,<sup>f</sup> P. Singh,<sup>a</sup> S. B. Rai<sup>b</sup> and R.

Maalej<sup>g</sup>

<sup>a</sup>Department of Physics, Indian Institute of Technology (BHU), Varanasi,  
India-221005

<sup>b</sup>Department of Physics, Banaras Hindu University, Varanasi, India-221005

10 <sup>c</sup>Department of Biological Engineering, Utah State University, Logan, Utah, USA-84322.

<sup>d</sup>Chemistry Division Bhabha Atomic Research Centre, Mumbai, India-400085

<sup>e</sup>Department of Physics, Andhra University, Visakhapatnam, India-530003

<sup>f</sup>Department of Pure and Applied Physics, Guru Ghasidas University, Bilaspur, India-495009

<sup>g</sup>Department of Physics, Sfax University, Sfax, Tunisia-3018

15 <sup>\*</sup>E-mail: [kareemskpa@hotmail.com](mailto:kareemskpa@hotmail.com) and [ak.parchur@usu.edu](mailto:ak.parchur@usu.edu)

Table S1. Atomic Coordinates, Isotropic Thermal Parameters, and Occupancy Obtained from Rietveld Refinement

| Samples<br>Y <sub>2</sub> Ti <sub>2</sub> O <sub>7</sub> :Er <sup>3+</sup> /Yb <sup>3+</sup>                         | Atom | Site | x        | y     | z     | U (Å <sup>2</sup> ) | Occupancy |
|----------------------------------------------------------------------------------------------------------------------|------|------|----------|-------|-------|---------------------|-----------|
| 0 Li <sup>+</sup>                                                                                                    | Y    | 16d  | 0.5      | 0.5   | 0.5   | 0.011               | 1.97      |
|                                                                                                                      | Er   | 16d  | 0.5      | 0.5   | 0.5   | 0.011               | 0.01      |
|                                                                                                                      | Yb   | 16d  | 0.5      | 0.5   | 0.5   | 0.011               | 0.02      |
|                                                                                                                      | Ti   | 16c  | 0        | 0     | 0     | 0.009               | 2.00      |
|                                                                                                                      | O1   | 48f  | 0.324(5) | 0.125 | 0.125 | 0.002               | 6.00      |
|                                                                                                                      | O2   | 8b   | 0.375    | 0.375 | 0.375 | 0.005               | 0.970     |
| a = 10.095(1) Å, V = 1028.64(3) Å <sup>3</sup> , R <sub>wp</sub> = 13.4, R <sub>p</sub> = 15.7, χ <sup>2</sup> = 4.2 |      |      |          |       |       |                     |           |

20

Table S2. Selected Bond Distances obtained from Rietveld Refinement

| Samples<br>Y <sub>2</sub> Ti <sub>2</sub> O <sub>7</sub> :Er <sup>3+</sup> /Yb <sup>3+</sup> | Bond Type      | CN | Bond Length(Å) |  |  |
|----------------------------------------------------------------------------------------------|----------------|----|----------------|--|--|
| 0 Li <sup>+</sup>                                                                            | Y(16d)-O1(48f) | 6  | 2.512(2)       |  |  |
|                                                                                              | Y(16d)-O2(8b)  | 2  | 2.185(3)       |  |  |

|  |                 |   |          |  |  |
|--|-----------------|---|----------|--|--|
|  | Ti(16c)-O1(48f) | 6 | 1.937(6) |  |  |
|--|-----------------|---|----------|--|--|

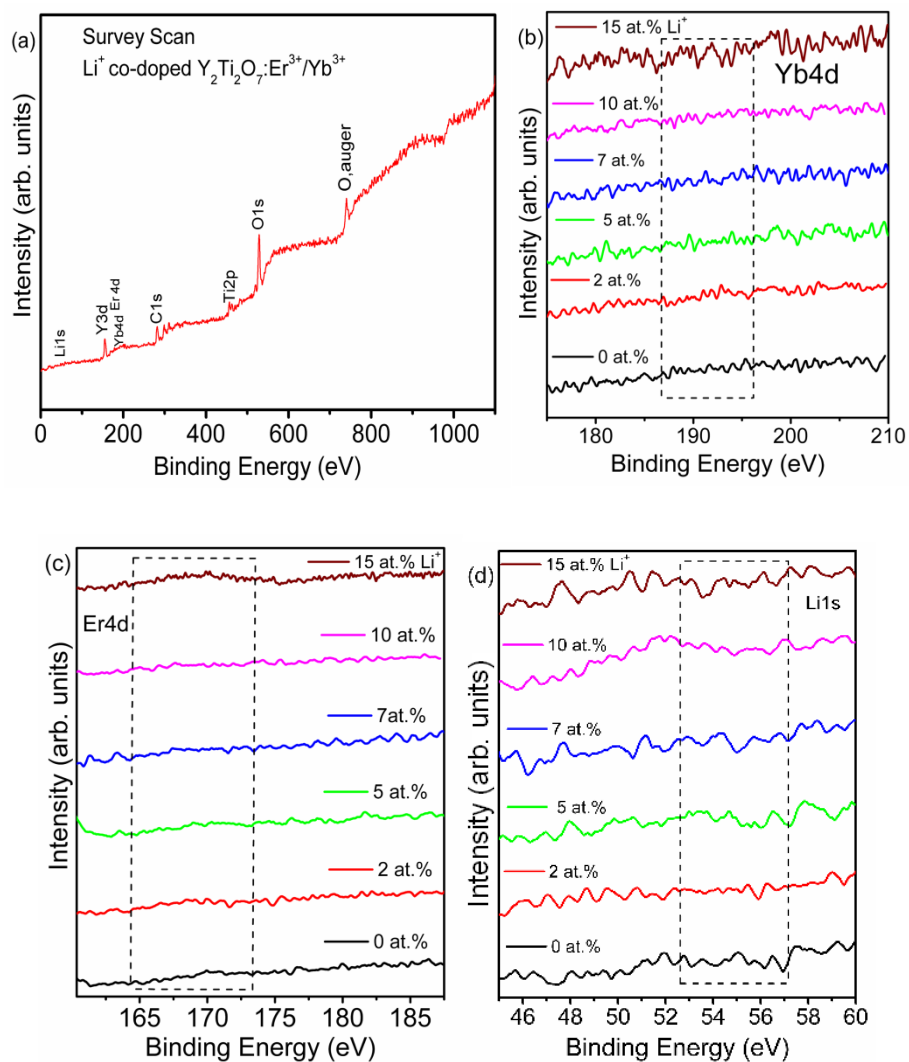

Fig.S1 (a) Survey Scan of 2 at.%  $\text{Li}^+$  co-doped  $\text{Y}_2\text{Ti}_2\text{O}_7:\text{Er}^{3+}/\text{Yb}^{3+}$  (b) XPS spectra of  $\text{Yb}(4d)$ , (c) XPS spectra of  $\text{Er}(4d)$  and (d) XPS spectra of  $\text{Li}1s$ .

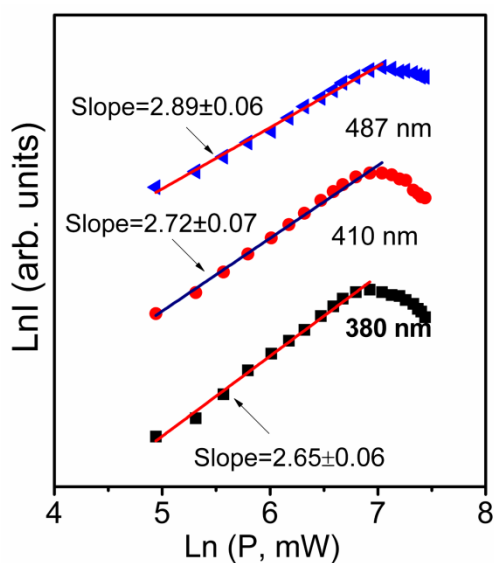

Fig. S2 Power dependence of UV and blue bands (380, 410 and 487 nm).

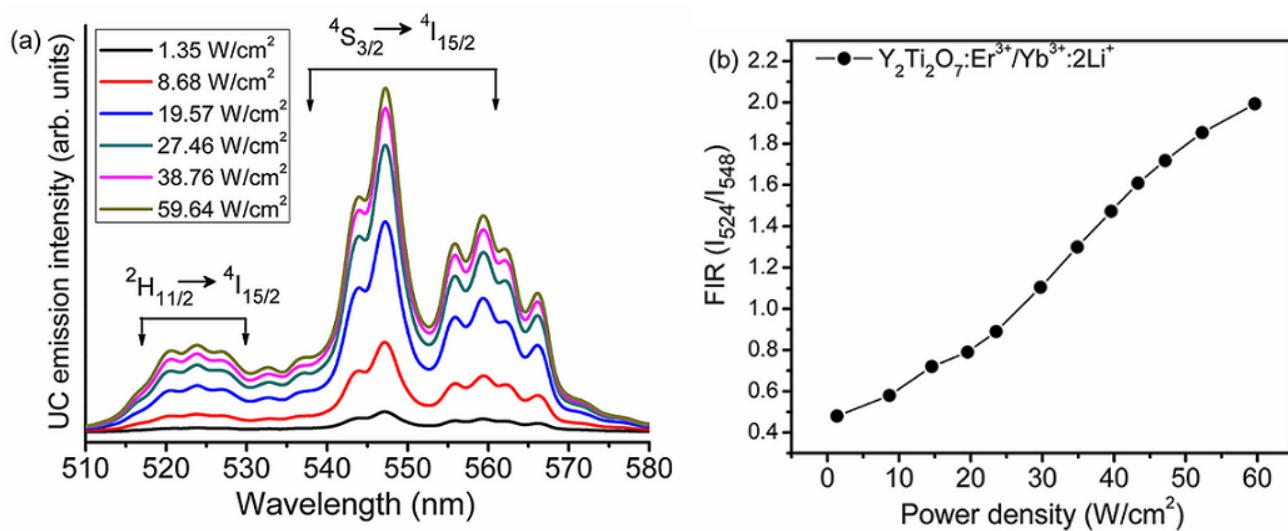

Fig. S3 show (a) Variation in the Up-conversion intensity at different pump power densities (b) Variation in FIR at different pump power densities at room temperature.
